# Supplementary material
Source: Springer Nature journal article supplement (https://www.springermedizin.de/resource/supplementary/12889_2014_7008_MOESM5_ESM.pdf/9499602)

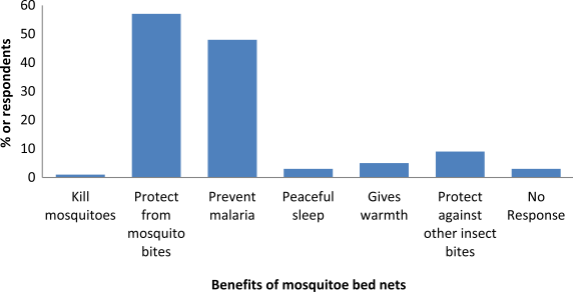

Supplement: MOESM5 [file 9499602]
